# Supplementary material
Source: PubMed Central journal article supplement (PMC3373730)
Supplement: NIHMS383269-supplement-supp_info.pdf [file NIHMS383269-supplement-supp_info.pdf]

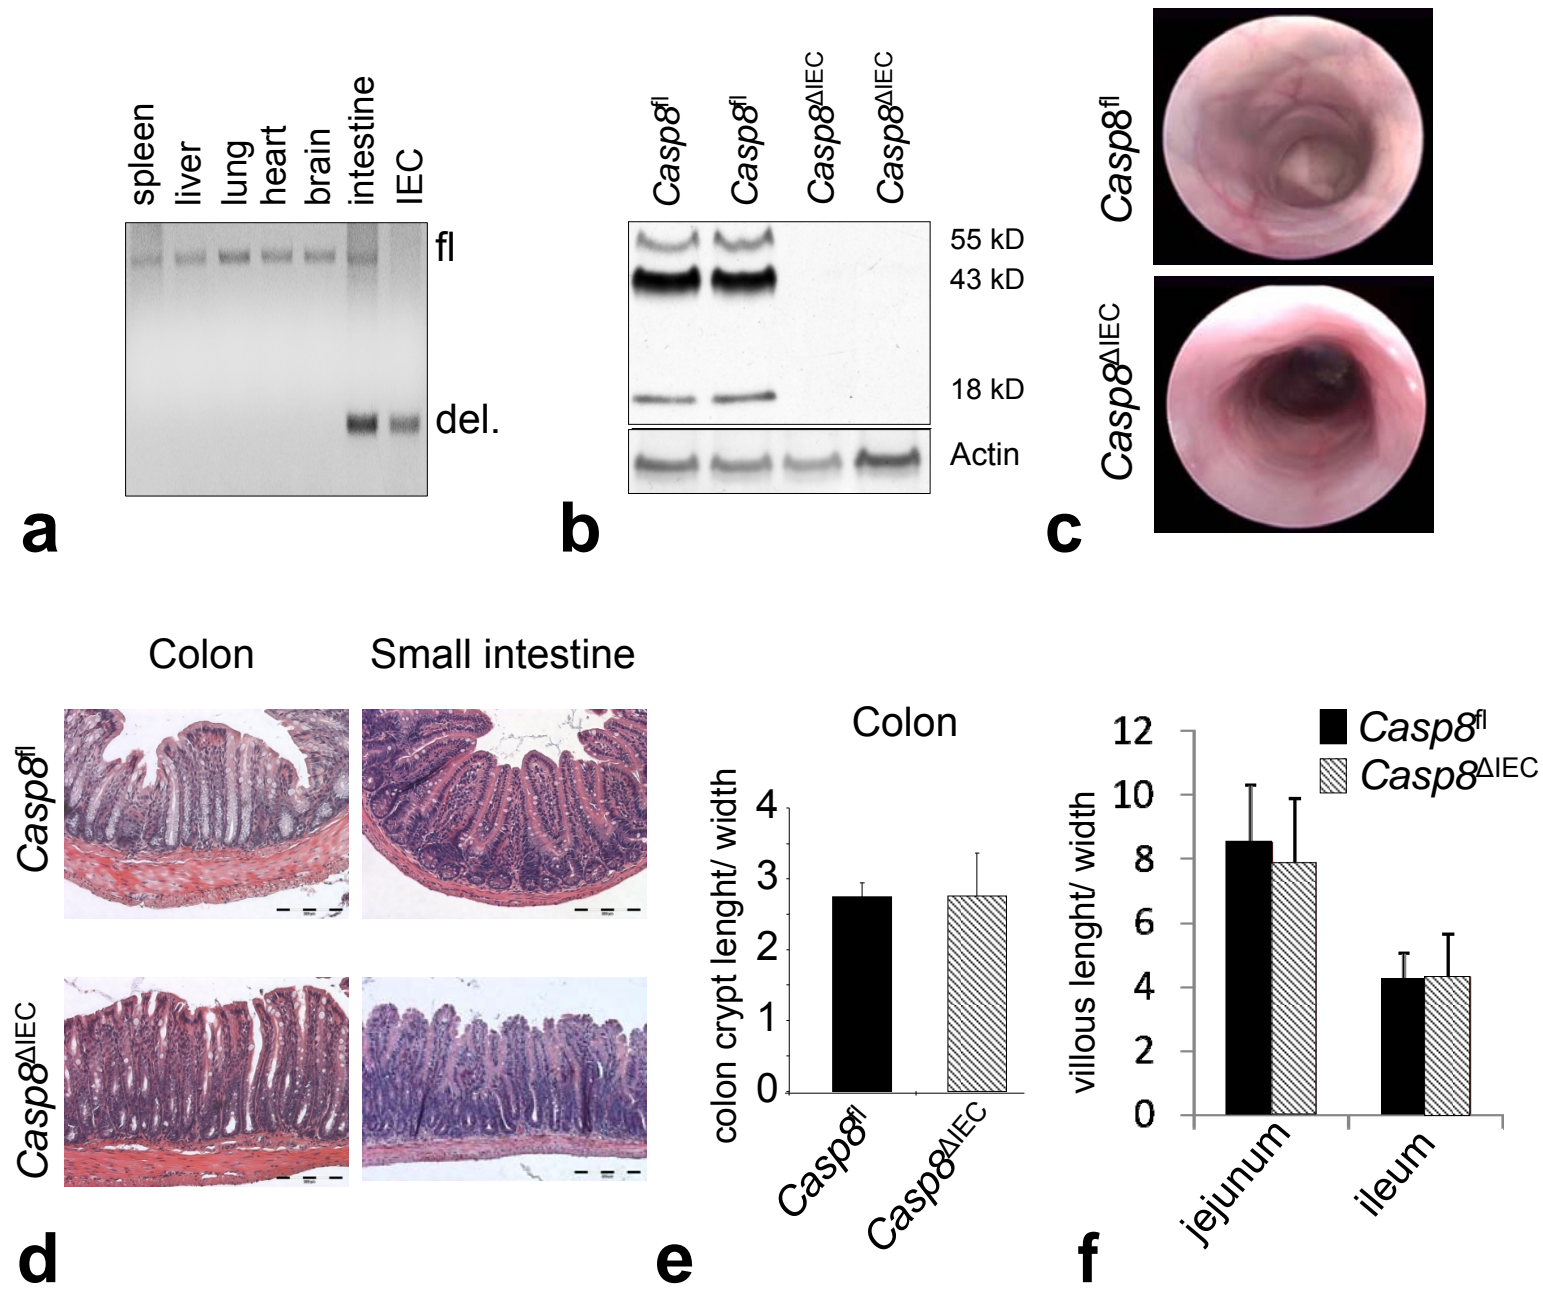

**Suppl. Figure 1: Caspase-8 is not essential for the structural development of the gut.**  
**(a)** Generation of *Casp8<sup>ΔIEC</sup>* mice. Presence of the Cre-deleted caspase-8 allele (del.) selectively detected in gut IEC. DNA was isolated from different organs and subjected to an allele-specific PCR (fl = undeleted). **(b)** Western blot analysis for caspase-8 using IEC lysates from control and *Casp8<sup>ΔIEC</sup>* mice. **(c)** Representative endoscopic pictures of the colon of control and *Casp8<sup>ΔIEC</sup>* mice 6 weeks after birth showing normal morphology and the absence of inflammation. **(d)** H&E staining of paraffin-embedded colon and small intestine from 6 week old control and *Casp8<sup>ΔIEC</sup>* mice. **(e+f)** Relative crypt and villous dimensions +SD calculated from H&E stained gut sections (n>=5 per group).

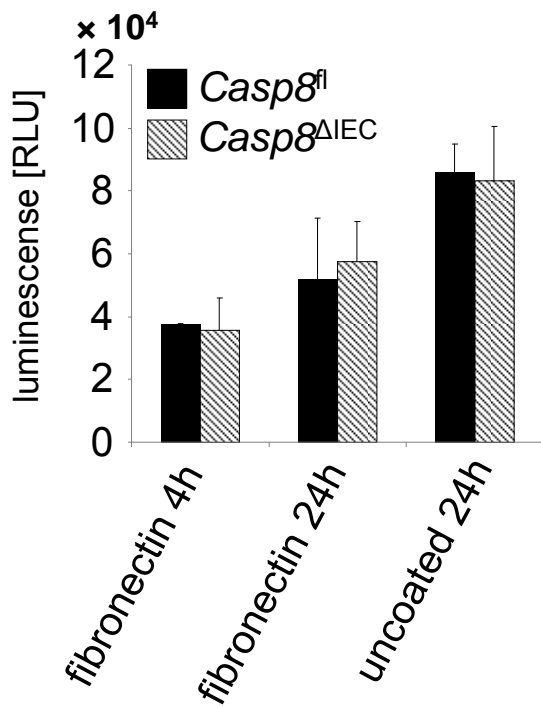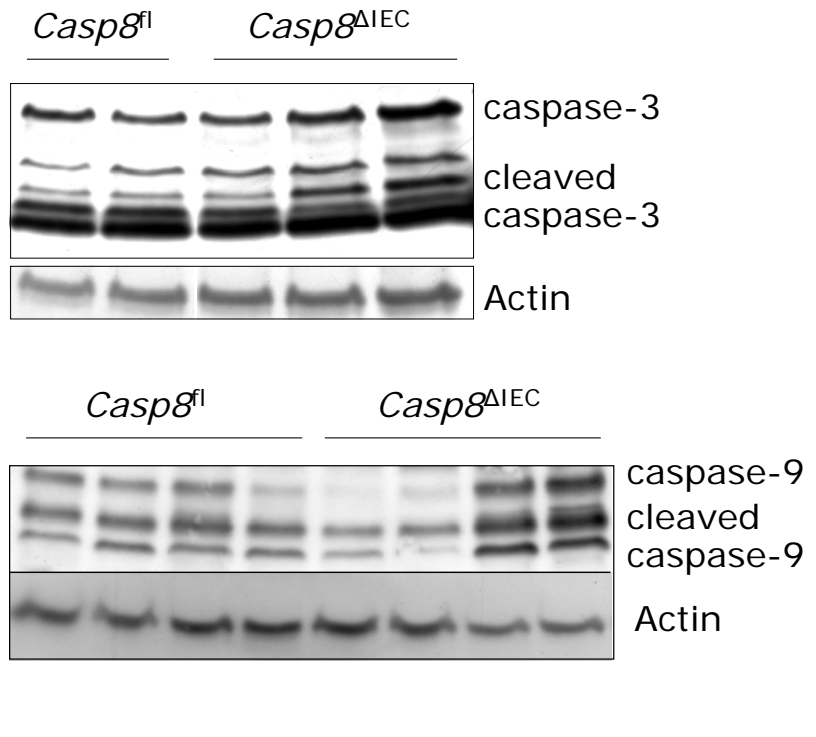

**Suppl. Figure 2:** Caspase-8 deletion did not result in apoptosis dysregulation of IECs. **(a)** Quantification of caspase-3/-7 activity after 4 and 24 hours *in vitro* cultivation of isolated primary control and caspase-8 deficient intestinal epithelial cells (n = 2 mice per group, + SD) **(b)** Western blot for caspase-3 and caspase-9 expression and activation in IEC lysates from control and caspase-8 deficient mice. Beta-actin antibody was used as a loading control.

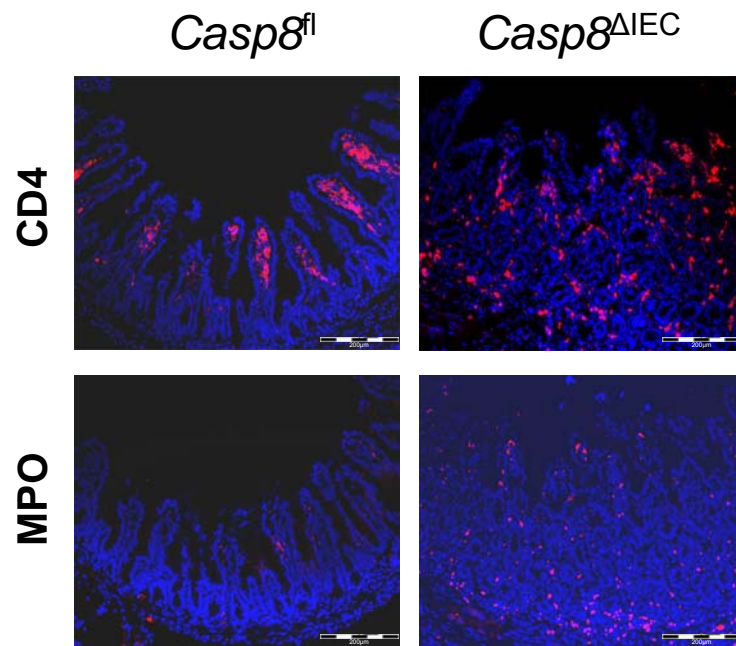

**Suppl. Figure 3:** Infiltration of the small intestinal lamina propria with immune cells. Immunohistochemical detection of T cells (CD4) and granulocytes (MPO) in the terminal ileum of control and *Casp8<sup>ΔIEC</sup>* mice.

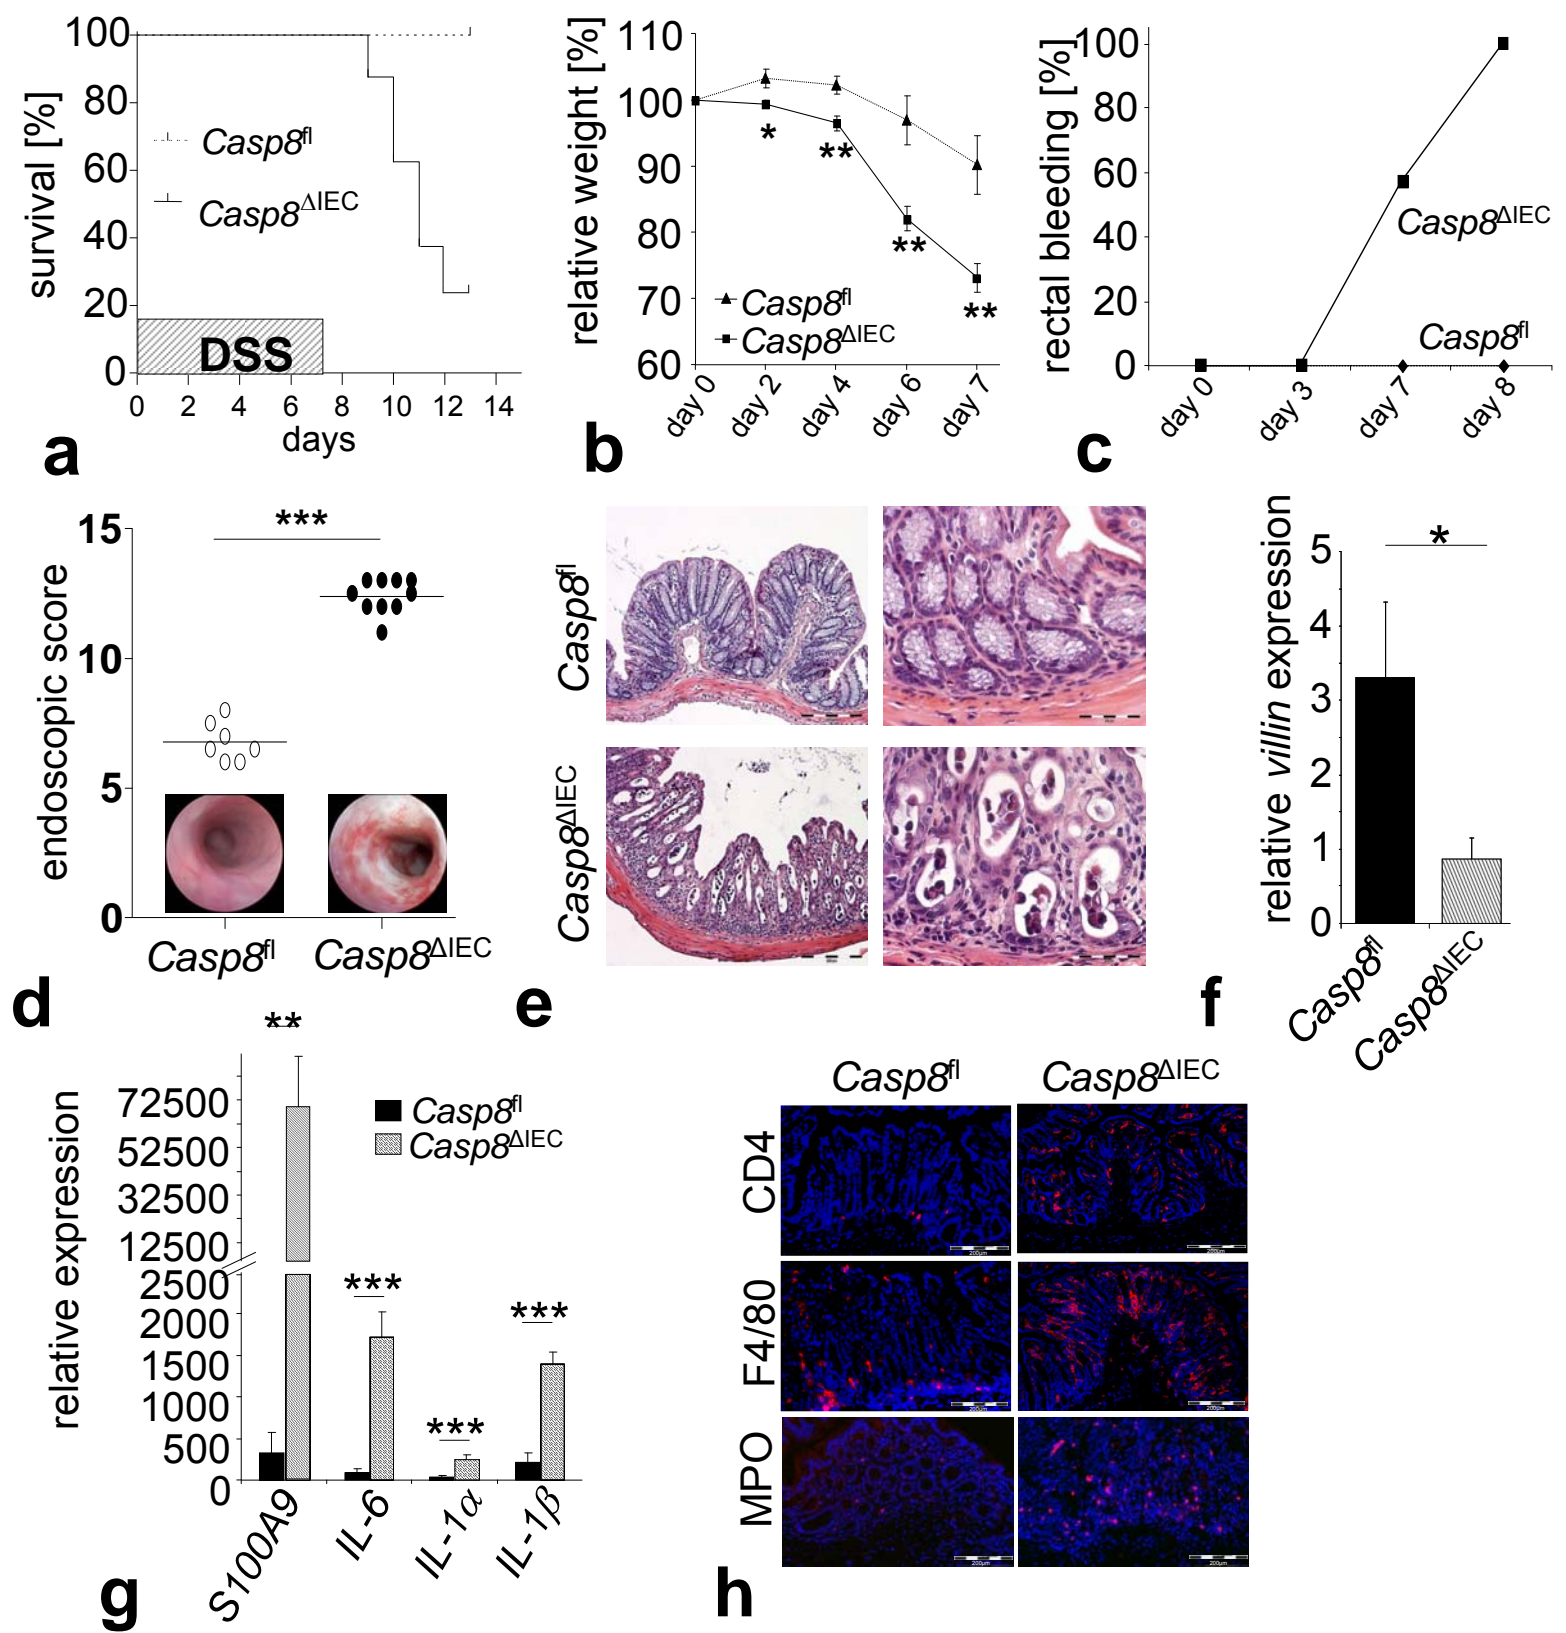

**Suppl. Figure 4: *Casp8<sup>ΔIEC</sup>* mice are highly susceptible to experimental colitis.**

Control (n>6) and *Casp8<sup>ΔIEC</sup>* (n>5) mice were treated with 1.5% (a) or 1% (b-h) DSS for 1 week. The experiment was repeated 5 times with similar results. **(a)** Kaplan-Meier survival curve **(b)** Weight loss was monitored over time and is indicated as % of the initial weight +/-SEM. **(c)** Percentage of mice showing rectal bleeding in response to DSS treatment. **(d)** Representative endoscopic pictures and endoscopic score of control and *Casp8<sup>ΔIEC</sup>* mice after 7 days of DSS treatment. **(e)** Representative H&E stained colon cross sections of DSS treated control and *Casp8<sup>ΔIEC</sup>* mice showing pronounced tissue damage with severe epithelial erosions. **(f)** Quantitative PCR for *Villin* expression in colon samples from control and *Casp8<sup>ΔIEC</sup>* mice. Mean values relative to *HPRT* are shown +SEM (n>5). **(g)** Expression of pro-inflammatory cytokines and chemokines in colon tissue of control and *Casp8<sup>ΔIEC</sup>* mice after DSS treatment (+SEM, relative to *HPRT*). **(h)** Colon cross sections from DSS treated control and *Casp8<sup>ΔIEC</sup>* mice were immunostained with antibodies for myeloperoxidase (MPO), CD4 and F4/80. Representative pictures are shown.



**a**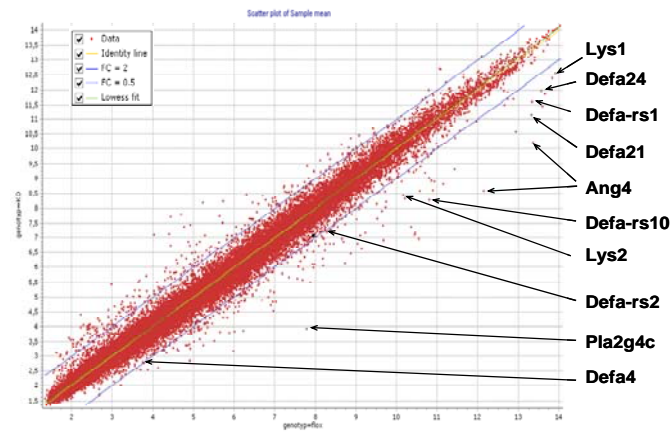**b**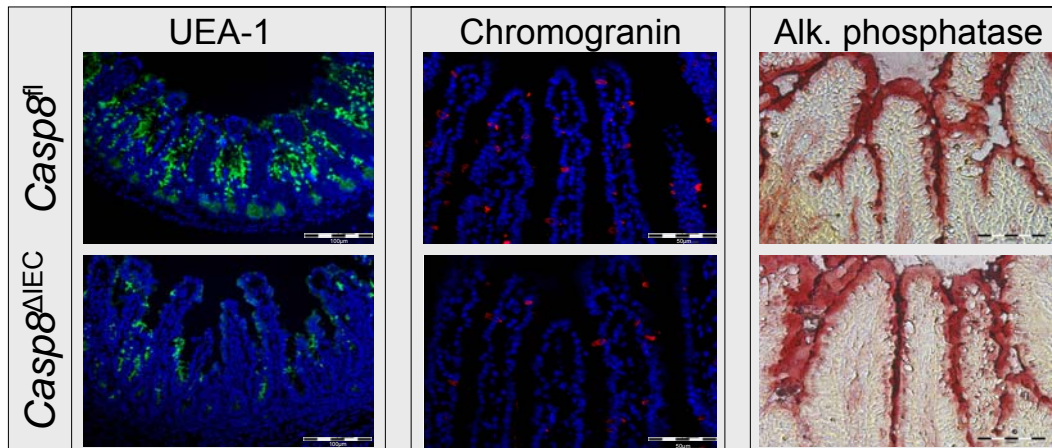**c**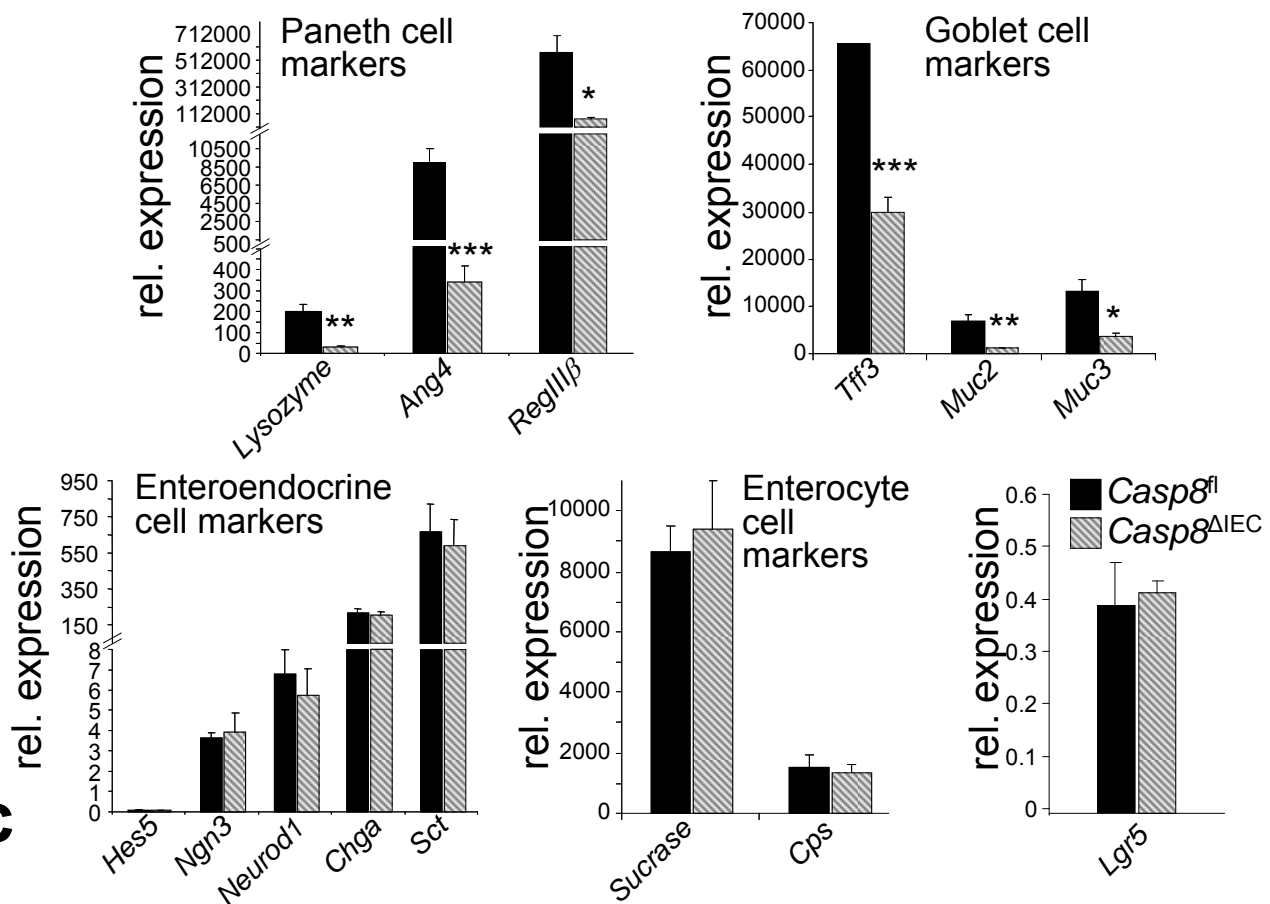

**Suppl. Figure 5:** Altered expression of antimicrobial genes in *Casp8<sup>ΔIEC</sup>* mice.

**(a)** Prevalence of genes belonging to the family of antimicrobial peptides in the group of downregulated genes using gene chip (of IEC from 3 control and 3 *Casp8<sup>ΔIEC</sup>* mice). The blue line indicates  $p$ -values  $< 0.05$ . **(b)** Cross sections from the ileum of 6 week old control and *Casp8<sup>ΔIEC</sup>* mice were stained for different cell types using specific markers (UEA-1 for goblet cells, chromogranin-A for enteroendocrine cells and alkaline phosphatase for absorptive enterocytes). **(c)** Quantitative expression level of *Lgr5* and various terminal differentiation markers in isolated IEC from 5 week old control and *Casp8<sup>ΔIEC</sup>* mice ( $n=10$ , mean values relative to HPRT +SEM).

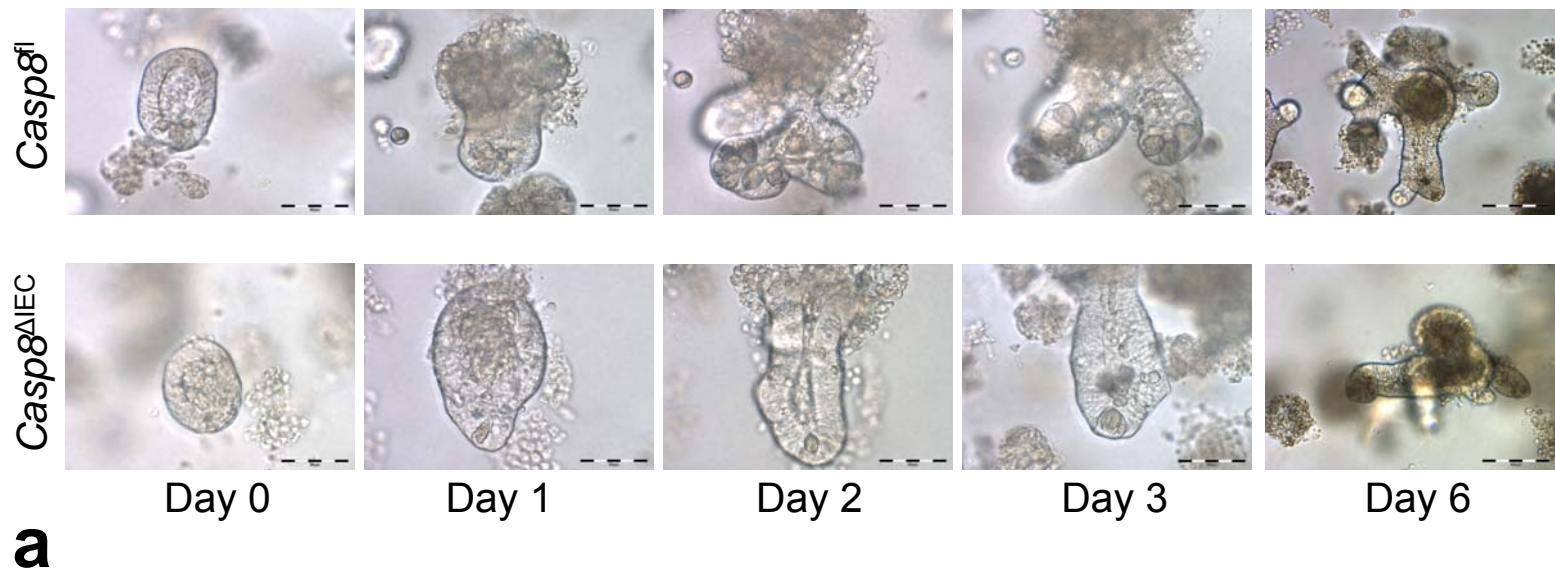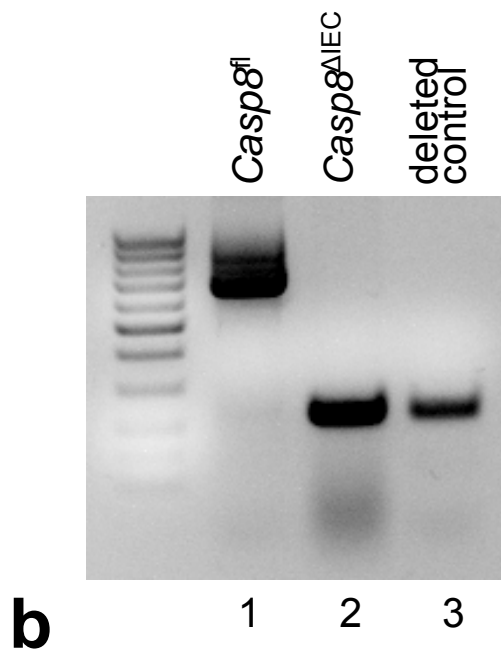

**Suppl. Figure 6:** Development of organoids from control and *Casp8*<sup>ΔIEC</sup> mice.

**(a)** *In vitro* culture of crypts isolated from control and *Casp8*<sup>ΔIEC</sup> mice as indicated in methods showing indistinguishable organoid development. **(b)** Allele-specific PCR confirmed the deletion of *caspase-8* in a Paneth cell positive organoid from a *Casp8*<sup>ΔIEC</sup> mouse (lane 2).

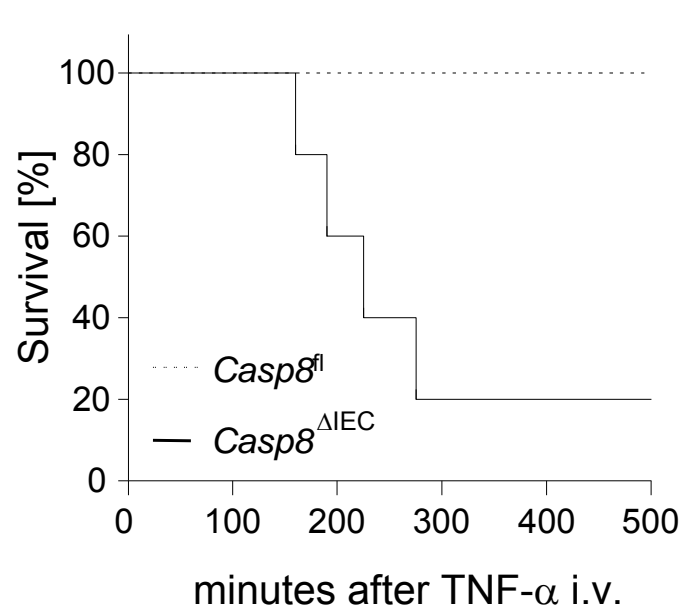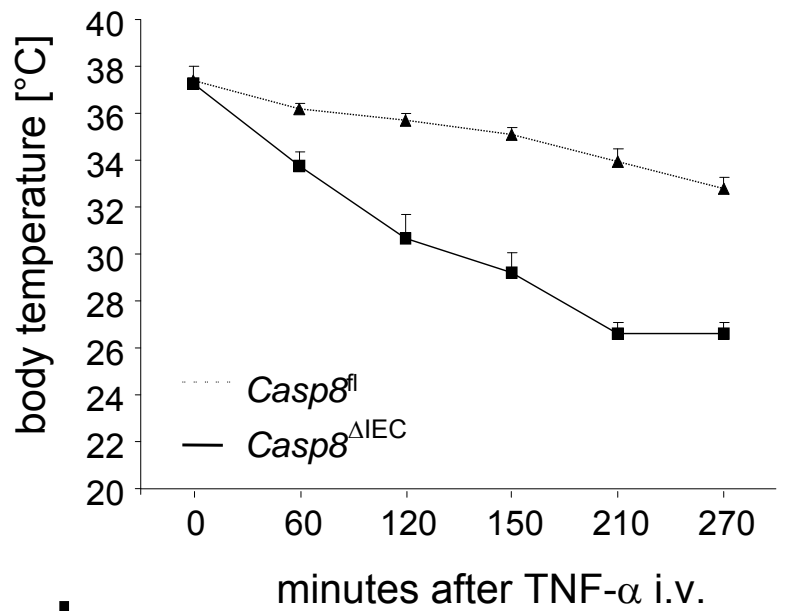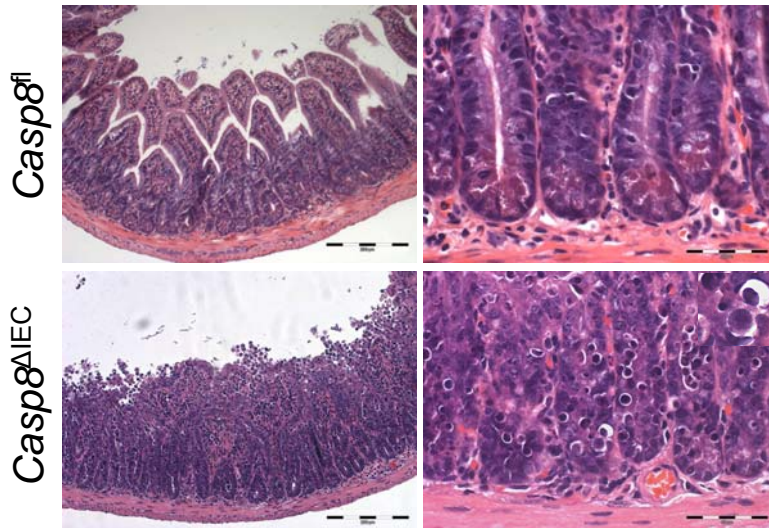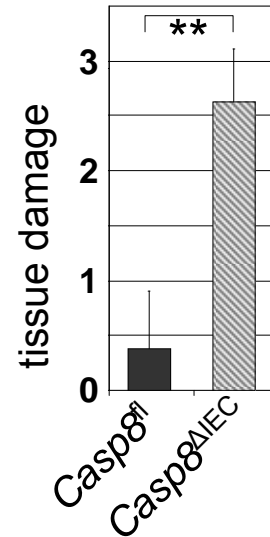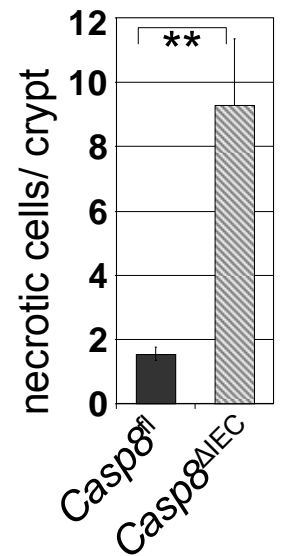

**Suppl. Figure 7:** Failure of *Casp8* <sup>$\Delta$ IEC</sup> mice to control TNF-mediated pathology.

**(a)** Kaplan-Meier survival curve and **(b)** body temperature (+SD) of control (n=4) and *Casp8* <sup>$\Delta$ IEC</sup> mice (n=5) after intravenous injection of TNF- $\alpha$ . **(c)** Representative histological pictures and **(d)** scoring (+SD) of tissue damage in the small intestine of TNF-treated mice 3 h after intravenous TNF- $\alpha$  injection. **(e)** Graph showing the number of necrotic cells (pyknotic nuclei and shrunken eosinophilic cytoplasm) per crypt (+SD) in cross sections from (c). Necrotic cells of each 10 crypts per animal were counted (n=6).



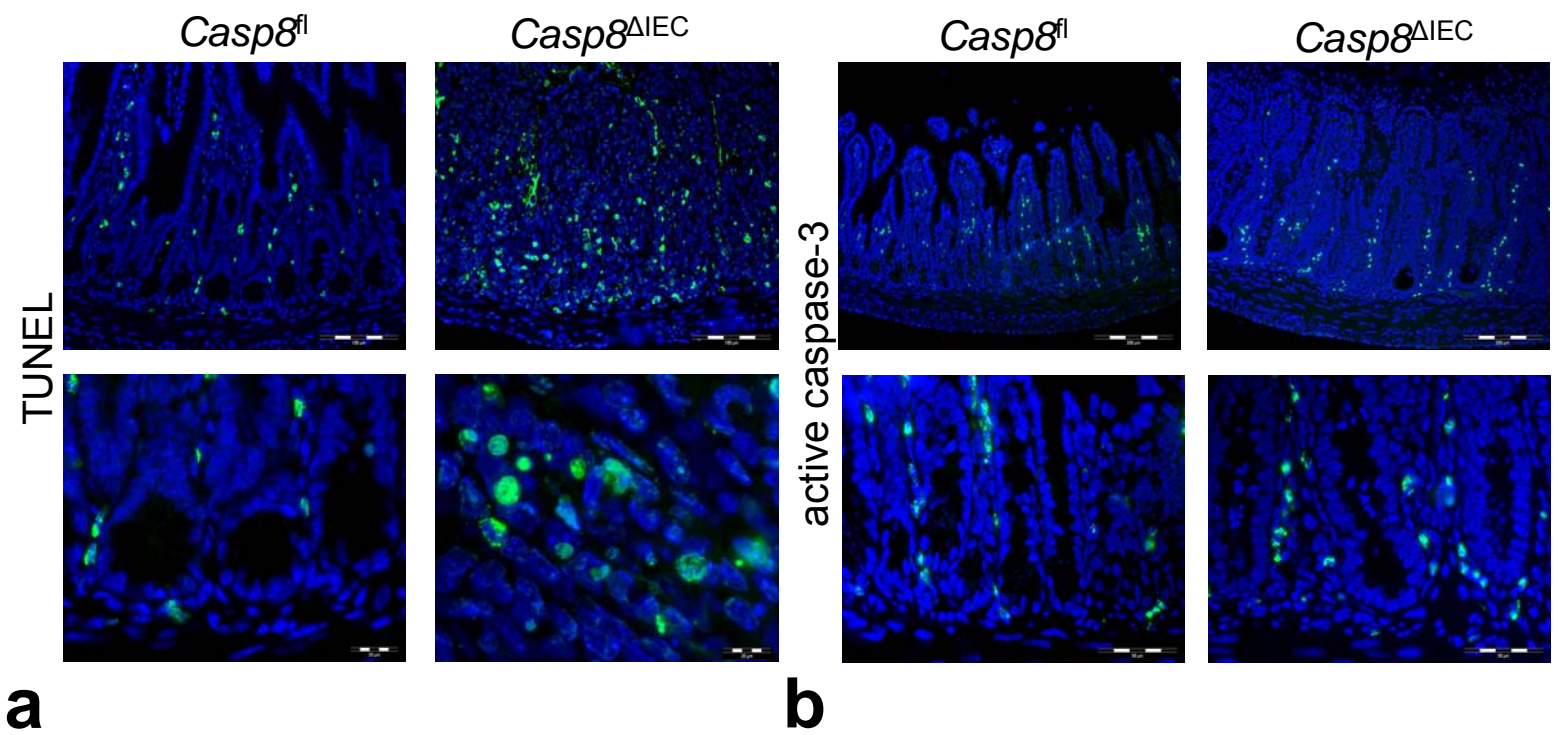

**a**

**b**

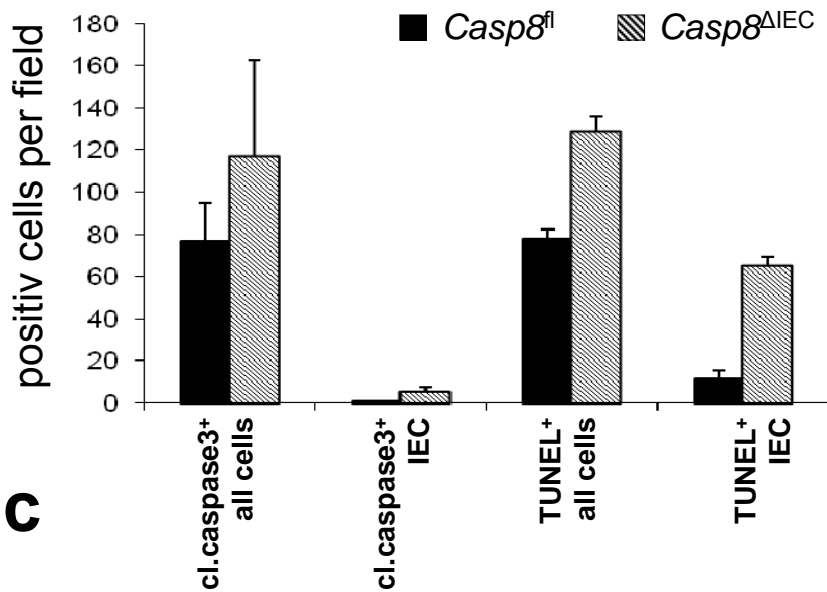

**c**

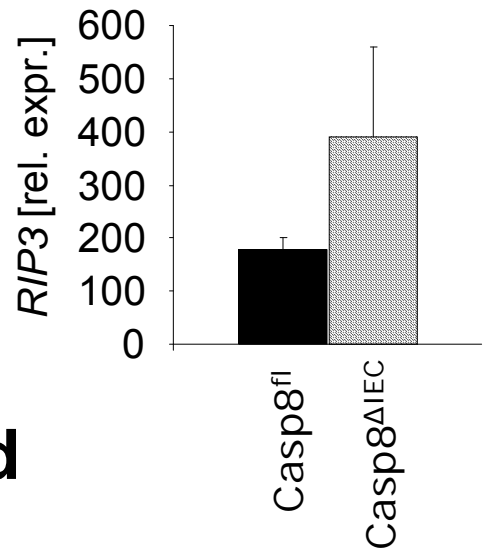

**d**

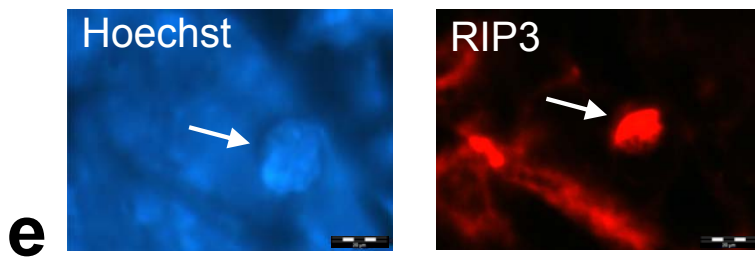

**e**

**Suppl. Figure 8: Epithelial cell death after TNF- $\alpha$  injection.**

Cross sections from the small intestine of TNF-treated control (n=3) and *Casp8*<sup>ΔIEC</sup> (n=3) mice were stained for TUNEL (a) and active caspase-3 (b). (c) Graph showing the average number of caspase-3 and TUNEL positive cells per microscopic field from (a) and (b) + SEM. (d) Quantitative RT-PCR analysis of *RIP3* in the terminal ileum of control (n=4) and *Casp8*<sup>ΔIEC</sup> (n=6) mice after TNF-treatment (+SEM, relative to *HPRT*) (e) Immunofluorescence staining of *RIP3* in terminal ileum cross sections of TNF-treated *Casp8*<sup>ΔIEC</sup> mice.



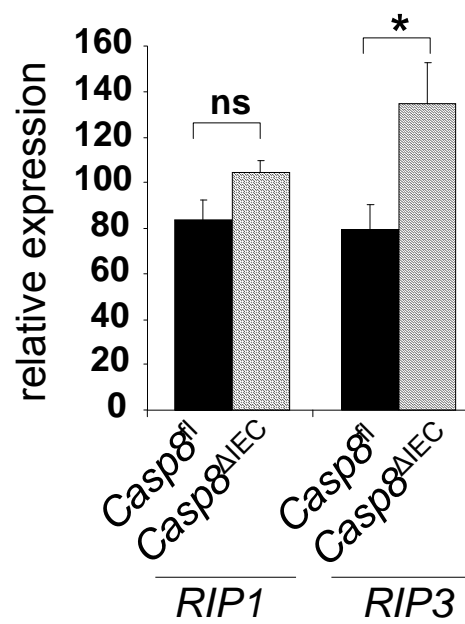

**Suppl. Figure 9:** Expression of *RIP1* and *RIP3* in the small intestine of control and *Casp8*<sup>ΔIEC</sup> mice.

Quantitative RT-PCR analysis of *RIP* expression in unchallenged primary IEC of control (n=6) and *Casp8*<sup>ΔIEC</sup> (n=6) mice (mean values relative to *HPRT* +SEM).

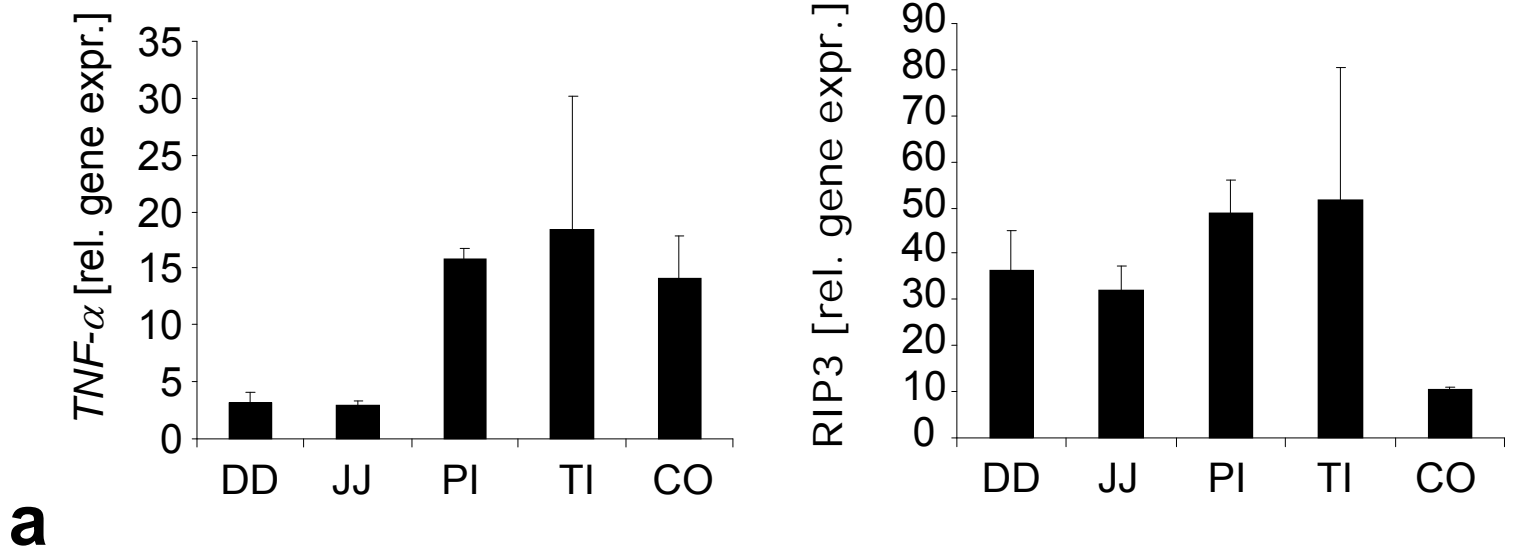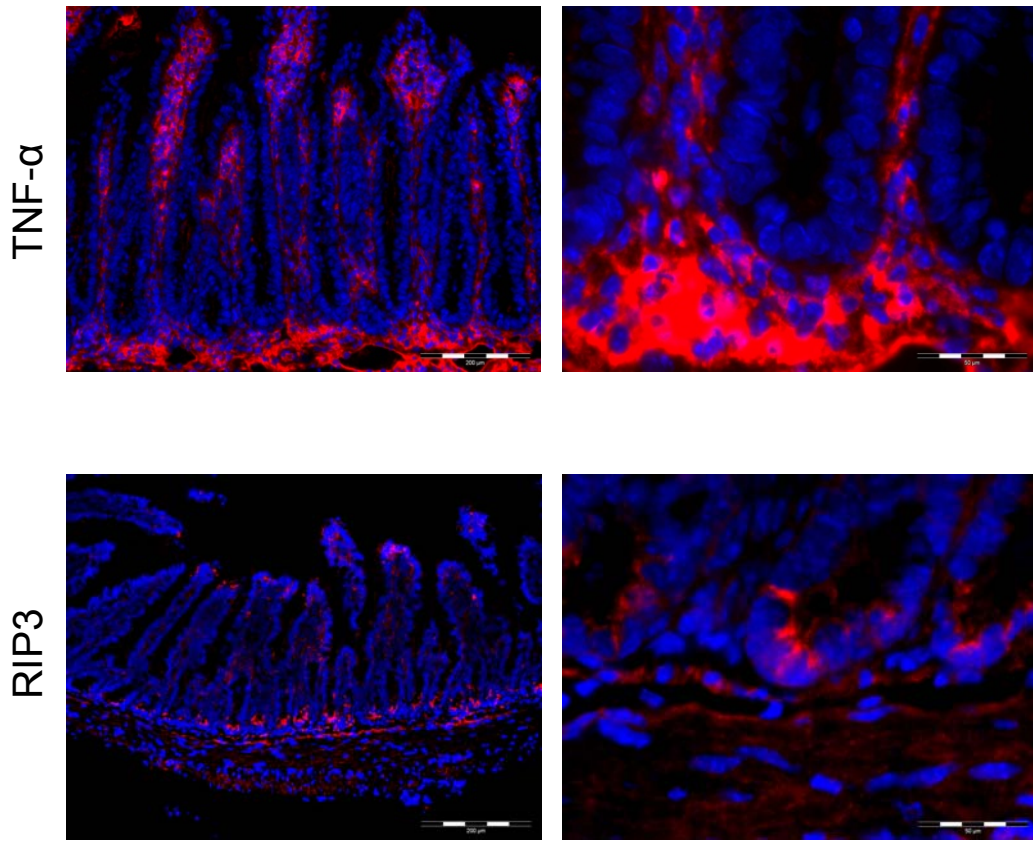

**Suppl. Figure 10:** *TNF- $\alpha$*  and *RIP-3* expression in the small intestine.

**(a)** Quantitative expression level (n=3) of *TNF- $\alpha$*  and *RIP3* in bowel segments of healthy control mice. DD=duodenum, JJ=Jejunum, PI=proximal ileum, TI=terminal ileum, CO=colon (+SEM, relative to *HPRT*) **(b)** Immunofluorescence detection of *TNF- $\alpha$*  and *RIP3* in small intestine cross sections of healthy control mice.

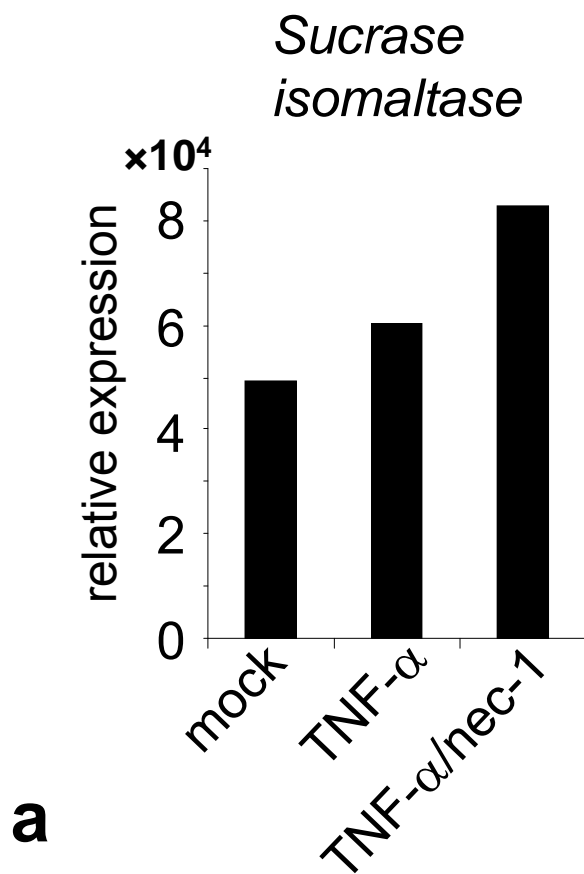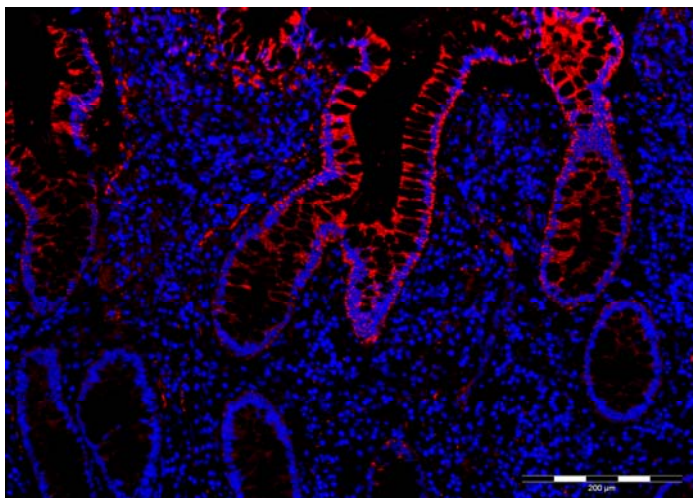

**b** caspase-8

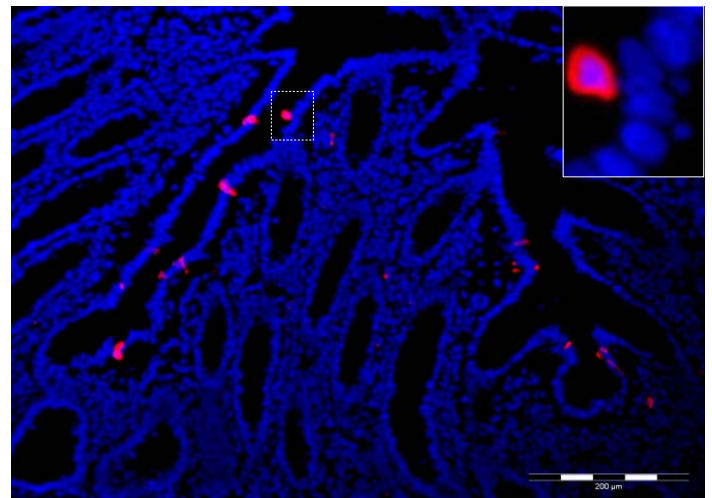

cleaved caspase-8

**Suppl. Figure 11:** Caspase-8 expression in the human terminal ileum.

**(a)** GRAPHS: Quantitative expression level of the enterocyte marker *sucrase isomaltase* relative to *HPRT* in biopsies from the small intestine of control patients stimulated *in vitro* with either DMSO (mock), TNF- $\alpha$  alone or in combination with necrostatin-1. Data from one representative experiment out of 2 is shown. **(b)** Representative pictures of a cross section from the terminal ileum of a control patient stained for caspase-8 and activated caspase-8 (cleaved caspase-8).

List of genes downregulated in Casp8<sup>ΔIEC</sup>

| Probeset     | Gene Title                                                                              | Gene Symbol                   | fold change | P-value |
|--------------|-----------------------------------------------------------------------------------------|-------------------------------|-------------|---------|
| 1436712_at   | phospholipase A2, group IVC (cytosolic, calcium-independent)                            | Pla2g4c                       | 14,4        | 0,0014  |
| 1438612_a_at | colipase, pancreatic                                                                    | Clps                          | 12,0        | 0,0000  |
| 1440832_at   | angiogenin, ribonuclease A family, member 4                                             | Ang4                          | 11,8        | 0,0004  |
| 1415805_at   | colipase, pancreatic                                                                    | Clps                          | 10,2        | 0,0000  |
| 1417735_at   | RIKEN cDNA 1810030J14 gene                                                              | 1810030J14Rik                 | 9,9         | 0,0003  |
| 1438364_x_at | angiogenin, ribonuclease A family, member 4                                             | Ang4                          | 8,9         | 0,0001  |
| 1450788_at   | serum amyloid A 1                                                                       | Saa1                          | 7,9         | 0,0813  |
| 1418368_at   | resistin like beta                                                                      | Retnlb                        | 7,0         | 0,0788  |
| 1419075_s_at | serum amyloid A 1                                                                       | Saa1                          | 6,9         | 0,0832  |
| 1454883_at   | gasdermin C2 /// hypothetical protein LOC100045250                                      | Gsdmc2 /// LOC100045250       | 6,1         | 0,0016  |
| 1422242_at   | defensin, alpha, related sequence 10                                                    | Defa-rs10                     | 5,7         | 0,0012  |
| 1448595_a_at | brain expressed gene 1                                                                  | Bex1                          | 5,7         | 0,0174  |
| 1418171_at   | similar to transcription elongation factor A (SII)-like 8 /// transcription elongator   | LOC100045031 /// Tceal8       | 5,4         | 0,0198  |
| 1419665_a_at | nuclear protein 1                                                                       | Nupr1                         | 5,4         | 0,0010  |
| 1419294_at   | RIKEN cDNA 1700011H14 gene                                                              | 1700011H14Rik                 | 5,3         | 0,0164  |
| 1418165_at   | intelectin 1 (galactofuranose binding)                                                  | Itln1                         | 5,2         | 0,0002  |
| 1428209_at   | brain expressed gene 4                                                                  | Bex4                          | 5,1         | 0,0018  |
| 1430641_at   | gasdermin C2 /// gasdermin C4                                                           | Gsdmc2 /// Gsdmc4             | 5,1         | 0,0009  |
| 1438858_x_at | histocompatibility 2, class II antigen A, alpha                                         | H2-Aa                         | 4,9         | 0,0034  |
| 1425519_a_at | CD74 antigen (invariant polypeptide of major histocompatibility complex, class II)      | Cd74                          | 4,8         | 0,0042  |
| 1419591_at   | gasdermin C                                                                             | Gsdmc                         | 4,7         | 0,0014  |
| 1419615_at   | transient receptor potential cation channel, subfamily V, member 6                      | Trpv6                         | 4,6         | 0,0175  |
| 1436857_at   | defensin, alpha, 21 /// defensin, alpha, 22                                             | Defa21 /// Defa22             | 4,6         | 0,0008  |
| 1419666_x_at | nuclear protein 1                                                                       | Nupr1                         | 4,4         | 0,0003  |
| 1429378_x_at | cDNA sequence AY761184                                                                  | AY761184                      | 4,4         | 0,0019  |
| 1443783_x_at | histocompatibility 2, class II antigen A, alpha                                         | H2-Aa                         | 4,4         | 0,0134  |
| 1448573_a_at | carcinoembryonic antigen-related cell adhesion molecule 10                              | Ceacam10                      | 4,3         | 0,0013  |
| 1436242_a_at | chemokine-like factor                                                                   | Cklf                          | 4,2         | 0,0051  |
| 1420249_s_at | chemokine (C-C motif) ligand 6                                                          | Ccl6                          | 4,1         | 0,0003  |
| 1435290_x_at | histocompatibility 2, class II antigen A, alpha                                         | H2-Aa                         | 4,1         | 0,0016  |
| 1428393_at   | neuritin 1                                                                              | Nrn1                          | 4,0         | 0,0027  |
| 1449478_at   | matrix metalloproteinase 7                                                              | Mmp7                          | 4,0         | 0,0046  |
| 1417074_at   | carcinoembryonic antigen-related cell adhesion molecule 10                              | Ceacam10                      | 3,9         | 0,0031  |
| 1417266_at   | chemokine (C-C motif) ligand 6                                                          | Ccl6                          | 3,9         | 0,0001  |
| 1449580_s_at | histocompatibility 2, class II, locus Mb1 /// histocompatibility 2, class II, locus Mb2 | H2-DMb1 /// H2-DMb2           | 3,8         | 0,0125  |
| 1422527_at   | histocompatibility 2, class II, locus DMA                                               | H2-DMa                        | 3,7         | 0,0146  |
| 1450648_s_at | histocompatibility 2, class II antigen A, beta 1                                        | H2-Ab1                        | 3,7         | 0,0077  |
| 1451721_a_at | histocompatibility 2, class II antigen A, beta 1                                        | H2-Ab1                        | 3,7         | 0,0068  |
| 1450128_at   | phospholipase A2, group IIA (platelets, synovial fluid)                                 | Pla2g2a                       | 3,7         | 0,0029  |
| 1429896_at   | RIKEN cDNA 5830408B19 gene                                                              | 5830408B19Rik                 | 3,6         | 0,0007  |
| 1416490_at   | transmembrane emp24 protein transport domain containing 6                               | Tmed6                         | 3,6         | 0,0020  |
| 1424618_at   | 4-hydroxyphenylpyruvic acid dioxygenase                                                 | Hpd                           | 3,6         | 0,0016  |
| 1437403_at   | sterile alpha motif domain containing 5                                                 | Samd5                         | 3,6         | 0,0001  |
| 1452431_s_at | histocompatibility 2, class II antigen A, alpha                                         | H2-Aa                         | 3,5         | 0,0018  |
| 1418638_at   | histocompatibility 2, class II, locus Mb1 /// histocompatibility 2, class II, locus Mb2 | H2-DMb1 /// H2-DMb2           | 3,5         | 0,0116  |
| 1459889_at   | chloride channel calcium activated 3                                                    | Clca3                         | 3,5         | 0,0081  |
| 1450709_at   | defensin, alpha, 5 /// predicted gene 10104 /// predicted gene 15315                    | Defa5 /// Gm10104 /// Gm15315 | 3,5         | 0,0008  |
| 1456319_at   | ---                                                                                     | ---                           | 3,4         | 0,0918  |
| 1423547_at   | lysozyme 2                                                                              | Lyz2                          | 3,4         | 0,0029  |
| 1418550_x_at | defensin, alpha, related sequence 1                                                     | Defa-rs1                      | 3,3         | 0,0006  |
| 1437438_x_at | pancreatic lipase-related protein 2                                                     | Pnliprp2                      | 3,3         | 0,0071  |
| 1450988_at   | leucine rich repeat containing G protein coupled receptor 5                             | Lgr5                          | 3,2         | 0,0054  |
| 1425477_x_at | histocompatibility 2, class II antigen A, beta 1                                        | H2-Ab1                        | 3,2         | 0,0038  |
| 1451791_at   | tissue factor pathway inhibitor                                                         | Tfpi                          | 3,2         | 0,0044  |
| 1417025_at   | histocompatibility 2, class II antigen E beta                                           | H2-Eb1                        | 3,2         | 0,0087  |
| 1417872_at   | four and a half LIM domains 1                                                           | Fhl1                          | 3,2         | 0,0654  |
| 1421211_a_at | class II transactivator                                                                 | Ciita                         | 3,2         | 0,0115  |
| 1427351_s_at | immunoglobulin heavy chain 6 (heavy chain of IgM)                                       | Igh-6                         | 3,1         | 0,0449  |
| 1448021_at   | family with sequence similarity 46, member C                                            | Fam46c                        | 3,0         | 0,0031  |
| 1438306_at   | ring finger protein 180                                                                 | Rnf180                        | 3,0         | 0,0892  |
| 1450631_x_at | defensin, alpha, 24                                                                     | Defa24                        | 3,0         | 0,0002  |
| 1453317_a_at | KH domain containing, RNA binding, signal transduction associated 3                     | Khdrbs3                       | 3,0         | 0,0154  |
| 1427482_a_at | carbonic anhydrase 8                                                                    | Car8                          | 2,9         | 0,0013  |
| 1436814_at   | RIKEN cDNA 1810010D01 gene                                                              | 1810010D01Rik                 | 2,9         | 0,0001  |
| 1435387_at   | solute carrier family 2 (facilitated glucose transporter), member 13                    | Slc2a13                       | 2,9         | 0,0189  |
| 1448299_at   | solute carrier family 1 (neuronal/epithelial high affinity glutamate transporter)       | Slc1a1                        | 2,9         | 0,0069  |
| 1437263_at   | RIKEN cDNA A730089K16 gene                                                              | A730089K16Rik                 | 2,9         | 0,0223  |
| 1444668_at   | amplified spermatogenic transcripts X encoded                                           | Astx                          | 2,9         | 0,0274  |
| 1441231_at   | Predicted gene 3626                                                                     | Gm3626                        | 2,8         | 0,0129  |
| 1448186_at   | pancreatic lipase-related protein 2                                                     | Pnliprp2                      | 2,8         | 0,0269  |
| 1427054_s_at | ABI gene family, member 3 (NESH) binding protein                                        | Abi3bp                        | 2,8         | 0,0626  |
| 1443225_at   | activin A receptor, type IC                                                             | Acvr1c                        | 2,7         | 0,0069  |
| 1439426_x_at | lysozyme 1                                                                              | Lyz1                          | 2,7         | 0,0000  |
| 1437422_at   | sema domain, seven thrombospondin repeats (type 1 and type 1-like), transmembrane       | Sema5a                        | 2,7         | 0,0740  |
| 1418282_x_at | serine (or cysteine) preptidase inhibitor, clade A, member 1B                           | Serpina1b                     | 2,7         | 0,0007  |
| 1439473_at   | ---                                                                                     | ---                           | 2,7         | 0,0422  |
| 1446748_at   | RIKEN cDNA 2010007H06 gene                                                              | 2010007H06Rik                 | 2,7         | 0,0003  |
| 1459443_at   | ---                                                                                     | ---                           | 2,7         | 0,0116  |
| 1427344_s_at | RASD family, member 2                                                                   | Rasd2                         | 2,7         | 0,0062  |
| 1425415_a_at | solute carrier family 1 (neuronal/epithelial high affinity glutamate transporter)       | Slc1a1                        | 2,6         | 0,0034  |
| 1438239_at   | midline 1                                                                               | Mid1                          | 2,6         | 0,0505  |



|              |                                                                                |                            |     |        |
|--------------|--------------------------------------------------------------------------------|----------------------------|-----|--------|
| 1427063_at   | RIKEN cDNA 5330417C22 gene                                                     | 5330417C22Rik              | 2,6 | 0,0042 |
| 1428097_at   | RIKEN cDNA 2510009E07 gene                                                     | 2510009E07Rik              | 2,6 | 0,0395 |
| 1456789_at   | zinc finger protein 462                                                        | Zfp462                     | 2,6 | 0,0210 |
| 1420250_at   | ---                                                                            | ---                        | 2,6 | 0,0066 |
| 1436996_x_at | lysozyme 1                                                                     | Lyz1                       | 2,6 | 0,0000 |
| 1437409_s_at | G protein-coupled receptor 126                                                 | Gpr126                     | 2,6 | 0,0107 |
| 1442113_at   | RIKEN cDNA 5330417C22 gene                                                     | 5330417C22Rik              | 2,5 | 0,0004 |
| 1442537_at   | ---                                                                            | ---                        | 2,5 | 0,0016 |
| 1418654_at   | hydroxyacid oxidase 2                                                          | Hao2                       | 2,5 | 0,0236 |
| 1423753_at   | BMP and activin membrane-bound inhibitor, homolog (Xenopus laevis)             | Bambi                      | 2,5 | 0,0109 |
| 1448545_at   | syndecan 2                                                                     | Sdc2                       | 2,5 | 0,0288 |
| 1457823_at   | cysteine rich protein 61                                                       | Cyr61                      | 2,5 | 0,0286 |
| 1449233_at   | basic helix-loop-helix family, member a15                                      | Bhlha15                    | 2,4 | 0,0096 |
| 1445598_at   | ---                                                                            | ---                        | 2,4 | 0,0713 |
| 1418925_at   | cadherin, EGF LAG seven-pass G-type receptor 1 (flamingo homolog, Dro          | Celsr1                     | 2,4 | 0,0026 |
| 1424556_at   | pyrroline-5-carboxylate reductase 1                                            | Pycr1                      | 2,4 | 0,0012 |
| 1417399_at   | growth arrest specific 6                                                       | Gas6                       | 2,4 | 0,0129 |
| 1446772_at   | ---                                                                            | ---                        | 2,4 | 0,0116 |
| 1451513_x_at | serine (or cysteine) peptidase inhibitor, clade A, member 1A /// serine (or c  | Serpina1a /// Serpina1b    | 2,4 | 0,0012 |
| 1450822_at   | lysozyme 1                                                                     | Lyz1                       | 2,4 | 0,0000 |
| 1438385_s_at | glutamic pyruvate transaminase (alanine aminotransferase) 2                    | Gpt2                       | 2,3 | 0,0074 |
| 1442340_x_at | cysteine rich protein 61                                                       | Cyr61                      | 2,3 | 0,0281 |
| 1430479_at   | RIKEN cDNA 2010007H06 gene                                                     | 2010007H06Rik              | 2,3 | 0,0014 |
| 1457904_at   | carbonic anhydrase 8                                                           | Car8                       | 2,3 | 0,0017 |
| 1452317_at   | homeobox B9                                                                    | Hoxb9                      | 2,3 | 0,0731 |
| 1449326_x_at | serum amyloid A 2                                                              | Saa2                       | 2,3 | 0,0897 |
| 1415837_at   | kallikrein 1                                                                   | Klk1                       | 2,3 | 0,0098 |
| 1417290_at   | leucine-rich alpha-2-glycoprotein 1                                            | Lrg1                       | 2,3 | 0,0039 |
| 1436815_x_at | RIKEN cDNA 1810010D01 gene                                                     | 1810010D01Rik              | 2,3 | 0,0005 |
| 1451230_a_at | WW domain binding protein 5                                                    | Wbp5                       | 2,3 | 0,0006 |
| 1418780_at   | cytochrome P450, family 39, subfamily a, polypeptide 1                         | Cyp39a1                    | 2,3 | 0,0049 |
| 1433847_at   | family with sequence similarity 40, member B                                   | Fam40b                     | 2,3 | 0,0324 |
| 1450781_at   | high mobility group AT-hook 2                                                  | Hmga2                      | 2,3 | 0,0049 |
| 1417011_at   | syndecan 2                                                                     | Sdc2                       | 2,3 | 0,0557 |
| 1448107_x_at | kallikrein 1                                                                   | Klk1                       | 2,3 | 0,0110 |
| 1416306_at   | chloride channel calcium activated 3                                           | Clica3                     | 2,3 | 0,0016 |
| 1418376_at   | fibroblast growth factor 15                                                    | Fgf15                      | 2,3 | 0,0250 |
| 1437385_at   | collagen and calcium binding EGF domains 1                                     | Ccbe1                      | 2,3 | 0,0045 |
| 1443408_at   | ---                                                                            | ---                        | 2,3 | 0,0007 |
| 1448680_at   | similar to serine (or cysteine) proteinase inhibitor, clade A, member 1c /// s | LOC100046946 /// Serpina1c | 2,3 | 0,0056 |
| 1427119_at   | serine peptidase inhibitor, Kazal type 4                                       | Spink4                     | 2,2 | 0,0011 |
| 1428948_at   | potassium large conductance calcium-activated channel, subfamily M, alp        | Kcnma1                     | 2,2 | 0,0006 |
| 1450139_at   | endoplasmic reticulum (ER) to nucleus signalling 2                             | Ern2                       | 2,2 | 0,0018 |
| 1442447_at   | ---                                                                            | ---                        | 2,2 | 0,0704 |
| 1448698_at   | cyclin D1                                                                      | Ccnd1                      | 2,2 | 0,0465 |
| 1460359_at   | armadillo repeat containing, X-linked 3                                        | Armxc3                     | 2,2 | 0,0996 |
| 1438244_at   | nuclear factor I/B                                                             | Nfib                       | 2,2 | 0,0176 |
| 1416473_a_at | immunoglobulin superfamily, DCC subclass, member 4                             | Igdcc4                     | 2,2 | 0,0155 |
| 1460407_at   | Spi-B transcription factor (Spi-1/PU.1 related)                                | Spib                       | 2,2 | 0,0161 |
| 1452326_at   | ATPase, Ca++ transporting, type 2C, member 2                                   | Atp2c2                     | 2,2 | 0,0014 |
| 1438245_at   | ---                                                                            | ---                        | 2,2 | 0,0558 |
| 1439622_at   | Ras association (RalGDS/AF-6) domain family member 4                           | Rassf4                     | 2,2 | 0,0173 |
| 1449455_at   | hemopoietic cell kinase                                                        | Hck                        | 2,2 | 0,0183 |
| 1457483_at   | ---                                                                            | ---                        | 2,2 | 0,0751 |
| 1456960_at   | ---                                                                            | ---                        | 2,2 | 0,0837 |
| 1435367_at   | mitogen-activated protein kinase 4                                             | Mapk4                      | 2,2 | 0,0796 |
| 1439106_at   | zinc finger protein 462                                                        | Zfp462                     | 2,2 | 0,0266 |
| 1460601_at   | myosin VIIA and Rab interacting protein                                        | Myrip                      | 2,2 | 0,0003 |
| 1447174_at   | ---                                                                            | ---                        | 2,2 | 0,0301 |
| 1425952_a_at | glucagon                                                                       | Gcg                        | 2,2 | 0,0049 |
| 1440285_at   | protein phosphatase 1, regulatory (inhibitor) subunit 9A                       | Ppp1r9a                    | 2,2 | 0,0221 |
| 1424271_at   | doublecortin-like kinase 1                                                     | Dclk1                      | 2,1 | 0,0121 |
| 1460386_a_at | solute carrier family 1 (neuronal/epithelial high affinity glutamate transport | Slc1a1                     | 2,1 | 0,0004 |
| 1417419_at   | cyclin D1                                                                      | Ccnd1                      | 2,1 | 0,0481 |
| 1425182_x_at | kallikrein 1-related peptidase b22 /// kallikrein 1-related peptidase b9       | Klk1b22 /// Klk1b9         | 2,1 | 0,0147 |
| 1447624_s_at | storkhead box 2                                                                | Stox2                      | 2,1 | 0,0863 |
| 1445838_at   | ---                                                                            | ---                        | 2,1 | 0,0101 |
| 1457664_x_at | complement component 2 (within H-2S)                                           | C2                         | 2,1 | 0,0027 |
| 1440770_at   | B-cell leukemia/lymphoma 2                                                     | Bcl2                       | 2,1 | 0,0898 |
| 1424373_at   | armadillo repeat containing, X-linked 3                                        | Armxc3                     | 2,1 | 0,0044 |
| 1441727_s_at | zinc finger protein 467                                                        | Zfp467                     | 2,1 | 0,0053 |
| 1460667_at   | cDNA sequence U90926                                                           | U90926                     | 2,1 | 0,0183 |
| 1428114_at   | solute carrier family 14 (urea transporter), member 1                          | Slc14a1                    | 2,1 | 0,0126 |
| 1437960_at   | calpain 13                                                                     | Capn13                     | 2,1 | 0,0023 |
| 1433209_at   | RIKEN cDNA 2210017G18 gene                                                     | 2210017G18Rik              | 2,1 | 0,0190 |
| 1453234_at   | RIKEN cDNA 1300002K09 gene                                                     | 1300002K09Rik              | 2,1 | 0,0042 |
| 1424394_at   | selenoprotein M                                                                | Selm                       | 2,1 | 0,0003 |
| 1435078_at   | tetratricopeptide repeat, ankyrin repeat and coiled-coil containing 2          | Tanc2                      | 2,1 | 0,0833 |
| 1424218_a_at | cAMP responsive element binding protein 3-like 4                               | Creb3l4                    | 2,1 | 0,0061 |
| 1430804_at   | solute carrier family 13 (sodium/sulfate symporters), member 1                 | Slc13a1                    | 2,1 | 0,0079 |
| 1441482_at   | ---                                                                            | ---                        | 2,1 | 0,0112 |
| 1434881_s_at | potassium channel tetramerisation domain containing 12                         | Kctd12                     | 2,1 | 0,0364 |
| 1435939_s_at | HEPACAM family member 2                                                        | Hepacam2                   | 2,1 | 0,0012 |
| 1416034_at   | CD24a antigen                                                                  | Cd24a                      | 2,1 | 0,0330 |
| 1459253_at   | RIKEN cDNA 1700023H06 gene                                                     | 1700023H06Rik              | 2,1 | 0,0216 |

|              |                                                                                  |                         |     |        |
|--------------|----------------------------------------------------------------------------------|-------------------------|-----|--------|
| 1451790_a_at | tissue factor pathway inhibitor                                                  | Tfpi                    | 2,1 | 0,0204 |
| 1448182_a_at | CD24a antigen                                                                    | Cd24a                   | 2,1 | 0,0085 |
| 1443056_at   | ---                                                                              | ---                     | 2,1 | 0,0869 |
| 1429831_at   | phosphoinositide-3-kinase adaptor protein 1                                      | Pik3ap1                 | 2,1 | 0,0148 |
| 1451912_a_at | fibroblast growth factor receptor-like 1 /// similar to fibroblast growth factor | Fgfr11 /// LOC100046239 | 2,1 | 0,0063 |
| 1443075_at   | ---                                                                              | ---                     | 2,1 | 0,0614 |
| 1451498_at   | leucine rich repeat containing 26                                                | Lrrc26                  | 2,1 | 0,0014 |
| 1456480_at   | furry homolog (Drosophila)                                                       | Fry                     | 2,1 | 0,0689 |
| 1428435_at   | mucin 2                                                                          | Muc2                    | 2,1 | 0,0108 |
| 1447166_at   | ---                                                                              | ---                     | 2,0 | 0,0213 |
| 1430357_at   | H3 histone, family 3B                                                            | H3f3b                   | 2,0 | 0,0330 |
| 1415777_at   | pancreatic lipase related protein 1                                              | Pnliprp1                | 2,0 | 0,0347 |
| 1451289_at   | doublecortin-like kinase 1                                                       | Dclk1                   | 2,0 | 0,0084 |
| 1424439_at   | RIKEN cDNA 1810065E05 gene                                                       | 1810065E05Rik           | 2,0 | 0,0238 |
| 1456072_at   | protein phosphatase 1, regulatory (inhibitor) subunit 9A                         | Ppp1r9a                 | 2,0 | 0,0193 |
| 1449464_at   | potassium voltage-gated channel, subfamily Q, member 1                           | Kcnq1                   | 2,0 | 0,0138 |
| 1418355_at   | nucleobindin 2                                                                   | Nucb2                   | 2,0 | 0,0048 |
| 1419086_at   | fibroblast growth factor binding protein 1                                       | Fgfbp1                  | 2,0 | 0,0191 |
| 1417420_at   | cyclin D1                                                                        | Ccnd1                   | 2,0 | 0,0206 |
| 1417985_at   | Notch-regulated ankyrin repeat protein                                           | Nrarp                   | 2,0 | 0,0143 |
| 1452966_at   | B-cell leukemia/lymphoma 11B                                                     | Bcl11b                  | 2,0 | 0,0697 |
| 1426990_at   | cubilin (intrinsic factor-cobalamin receptor)                                    | Cubn                    | 2,0 | 0,0511 |
| 1446095_at   | antisense Igf2r RNA                                                              | Airn                    | 2,0 | 0,0676 |
| 1441644_at   | ---                                                                              | ---                     | 2,0 | 0,0517 |
| 1441498_at   | ---                                                                              | ---                     | 2,0 | 0,0712 |
| 1441375_at   | ---                                                                              | ---                     | 2,0 | 0,0873 |
| 1445881_at   | RIKEN cDNA 2310035P21 gene                                                       | 2310035P21Rik           | 2,0 | 0,0411 |
| 1422422_at   | defensin, alpha, 4                                                               | Defa4                   | 2,0 | 0,0030 |
| 1420822_s_at | sphingosine-1-phosphate phosphatase 1                                            | Sgpp1                   | 2,0 | 0,0018 |

List of genes upregulated in Casp8<sup>ΔIEC</sup>

| Probeset     | Gene Title                                                                                                 | Gene Symbol         | fold change | P-value |
|--------------|------------------------------------------------------------------------------------------------------------|---------------------|-------------|---------|
| 1451798_at   | interleukin 1 receptor antagonist                                                                          | Il1rn               | 9,6         | 0,0012  |
| 1453092_at   | cysteine-rich C-terminal 1                                                                                 | Crc1                | 8,3         | 0,0002  |
| 1448213_at   | annexin A1                                                                                                 | Anxa1               | 7,8         | 0,0039  |
| 1427873_at   | defensin, alpha, 15                                                                                        | Defa15              | 6,5         | 0,0000  |
| 1422749_at   | lymphocyte antigen 6 complex, locus G6C                                                                    | Ly6g6c              | 6,1         | 0,0149  |
| 1451612_at   | metallothionein 1                                                                                          | Mt1                 | 5,8         | 0,0007  |
| 1416930_at   | lymphocyte antigen 6 complex, locus D                                                                      | Ly6d                | 5,7         | 0,0067  |
| 1427760_s_at | prolactin family 2, subfamily c, member 2 /// prolactin family 2, subfamily c Prl2c2 /// Prl2c3 /// Prl2c4 | Prl2c2              | 5,5         | 0,0002  |
| 1425663_at   | interleukin 1 receptor antagonist                                                                          | Il1rn               | 4,9         | 0,0016  |
| 1427735_a_at | actin, alpha 1, skeletal muscle                                                                            | Acta1               | 4,4         | 0,0034  |
| 1423436_at   | glutathione S-transferase, alpha 3                                                                         | Gsta3               | 4,3         | 0,0053  |
| 1428958_at   | progesterin and adipoQ receptor family member VIII                                                         | Paqr8               | 4,0         | 0,0064  |
| 1422008_a_at | aquaporin 3                                                                                                | Aqp3                | 3,7         | 0,0096  |
| 1444468_at   | progesterin and adipoQ receptor family member VIII                                                         | Paqr8               | 3,5         | 0,0004  |
| 1435246_at   | progesterin and adipoQ receptor family member VIII                                                         | Paqr8               | 3,4         | 0,0005  |
| 1422400_a_at | GPI anchored molecule like protein /// hematopoietic cell transcript 1                                     | Gml /// Hemt1       | 3,4         | 0,0820  |
| 1419717_at   | sema domain, immunoglobulin domain (Ig), short basic domain, secreted                                      | Sema3e              | 3,4         | 0,0001  |
| 1449133_at   | small proline-rich protein 1A                                                                              | Spr1a               | 3,3         | 0,0870  |
| 1421008_at   | radical S-adenosyl methionine domain containing 2                                                          | Rsad2               | 3,3         | 0,0807  |
| 1421040_a_at | glutathione S-transferase, alpha 2 (Yc2)                                                                   | Gsta2               | 3,3         | 0,0123  |
| 1448894_at   | aldo-keto reductase family 1, member B8                                                                    | Akr1b8              | 3,2         | 0,0107  |
| 1422639_at   | calcitonin-related polypeptide, beta                                                                       | Calcb               | 3,2         | 0,0147  |
| 1421923_at   | SH3-domain binding protein 5 (BTK-associated)                                                              | Sh3bp5              | 3,2         | 0,0081  |
| 1427912_at   | carbonyl reductase 3                                                                                       | Cbr3                | 3,2         | 0,0100  |
| 1424962_at   | transmembrane 4 superfamily member 4                                                                       | Tm4sf4              | 3,2         | 0,0039  |
| 1425567_a_at | annexin A5                                                                                                 | Anxa5               | 3,1         | 0,0011  |
| 1423437_at   | glutathione S-transferase, alpha 3                                                                         | Gsta3               | 3,1         | 0,0005  |
| 1422557_s_at | metallothionein 1                                                                                          | Mt1                 | 3,1         | 0,0001  |
| 1431042_at   | progesterin and adipoQ receptor family member VIII                                                         | Paqr8               | 2,9         | 0,0015  |
| 1421752_a_at | serine (or cysteine) peptidase inhibitor, clade B, member 5                                                | Serpib5             | 2,9         | 0,0523  |
| 1422620_s_at | phosphatidic acid phosphatase type 2A                                                                      | Ppap2a              | 2,9         | 0,0009  |
| 1441851_x_at | lymphocyte antigen 6 complex, locus G6C                                                                    | Ly6g6c              | 2,9         | 0,0288  |
| 1431591_s_at | predicted gene 9706 /// ISG15 ubiquitin-like modifier                                                      | Gm9706 /// Isg15    | 2,8         | 0,0046  |
| 1449385_at   | hydroxysteroid (17-beta) dehydrogenase 6                                                                   | Hsd17b6             | 2,8         | 0,0093  |
| 1421134_at   | amphiregulin                                                                                               | Areg                | 2,8         | 0,0171  |
| 1449195_s_at | chemokine (C-X-C motif) ligand 16                                                                          | Cxcl16              | 2,8         | 0,0007  |
| 1422619_at   | phosphatidic acid phosphatase type 2A                                                                      | Ppap2a              | 2,8         | 0,0007  |
| 1421912_at   | solute carrier family 23 (nucleobase transporters), member 1                                               | Slc23a1             | 2,8         | 0,0351  |
| 1459059_at   | RIKEN cDNA 2010308F09 gene                                                                                 | 2010308F09Rik       | 2,7         | 0,0336  |
| 1417889_at   | apolipoprotein B mRNA editing enzyme, catalytic polypeptide 2                                              | Apobec2             | 2,6         | 0,0608  |
| 1451777_at   | DEAD (Asp-Glu-Ala-Asp) box polypeptide 60                                                                  | Ddx60               | 2,6         | 0,0114  |
| 1420499_at   | GTP cyclohydrolase 1                                                                                       | Gch1                | 2,6         | 0,0105  |
| 1450404_at   | solute carrier family 23 (nucleobase transporters), member 1                                               | Slc23a1             | 2,6         | 0,0188  |
| 1419816_s_at | ERBB receptor feedback inhibitor 1                                                                         | Errfi1              | 2,5         | 0,0269  |
| 1430674_at   | RIKEN cDNA 1700016C15 gene                                                                                 | 1700016C15Rik       | 2,5         | 0,0419  |
| 1418572_x_at | tumor necrosis factor receptor superfamily, member 12a                                                     | Tnfrsf12a           | 2,5         | 0,0192  |
| 1416257_at   | calpain 2                                                                                                  | Capn2               | 2,5         | 0,0143  |
| 1443841_x_at | UDP-N-acetylglucosamine pyrophosphorylase 1-like 1                                                         | Uap111              | 2,5         | 0,0011  |
| 1438037_at   | hect domain and RLD 5                                                                                      | Herc5               | 2,5         | 0,0088  |
| 1422975_at   | membrane metallo endopeptidase                                                                             | Mme                 | 2,5         | 0,0309  |
| 1432282_a_at | TLC domain containing 2                                                                                    | Tlcd2               | 2,5         | 0,0081  |
| 1438036_x_at | family with sequence similarity 82, member A1                                                              | Fam82a1             | 2,5         | 0,0699  |
| 1428834_at   | dual specificity phosphatase 4                                                                             | Dusp4               | 2,5         | 0,0118  |
| 1424853_s_at | cytochrome P450, family 4, subfamily a, polypeptide 10 /// cytochrome P4                                   | Cyp4a10 /// Cyp4a31 | 2,4         | 0,0238  |
| 1449071_at   | myosin, light polypeptide 7, regulatory                                                                    | My17                | 2,4         | 0,0470  |
| 1438579_at   | UTP14, U3 small nucleolar ribonucleoprotein, homolog B (yeast)                                             | Utp14b              | 2,4         | 0,0296  |
| 1428386_at   | acyl-CoA synthetase long-chain family member 3                                                             | Acs13               | 2,4         | 0,0070  |
| 1423555_a_at | interferon-induced protein 44                                                                              | Ifi44               | 2,4         | 0,0212  |
| 1416200_at   | interleukin 33                                                                                             | Il33                | 2,4         | 0,0561  |
| 1418571_at   | tumor necrosis factor receptor superfamily, member 12a                                                     | Tnfrsf12a           | 2,4         | 0,0285  |
| 1424339_at   | 2'-5' oligoadenylate synthetase-like 1                                                                     | Oasl1               | 2,4         | 0,0166  |
| 1450460_at   | aquaporin 3                                                                                                | Aqp3                | 2,4         | 0,0076  |
| 1447243_at   | cDNA sequence BC040756                                                                                     | BC040756            | 2,4         | 0,0196  |
| 1419207_at   | zinc finger protein 37                                                                                     | Zfp37               | 2,4         | 0,0235  |
| 1449789_x_at | lymphocyte antigen 6 complex, locus G6C                                                                    | Ly6g6c              | 2,4         | 0,0751  |
| 1455063_at   | family with sequence similarity 82, member A1                                                              | Fam82a1             | 2,4         | 0,0144  |
| 1424623_at   | serine (or cysteine) peptidase inhibitor, clade B, member 5                                                | Serpib5             | 2,3         | 0,0015  |
| 1449025_at   | interferon-induced protein with tetratricopeptide repeats 3                                                | Ifit3               | 2,3         | 0,0049  |
| 1417311_at   | cysteine rich protein 2                                                                                    | Crip2               | 2,3         | 0,0431  |
| 1452771_s_at | acyl-CoA synthetase long-chain family member 3                                                             | Acs13               | 2,3         | 0,0176  |
| 1455106_a_at | creatine kinase, brain                                                                                     | Ckb                 | 2,3         | 0,0038  |
| 1421073_a_at | prostaglandin E receptor 4 (subtype EP4)                                                                   | Ptger4              | 2,3         | 0,0357  |
| 1425137_a_at | histocompatibility 2, Q region locus 10                                                                    | H2-Q10              | 2,3         | 0,0490  |
| 1434028_at   | aryl hydrocarbon receptor nuclear translocator 2                                                           | Arnt2               | 2,3         | 0,0074  |
| 1422072_a_at | glutathione S-transferase, mu 6                                                                            | Gstm6               | 2,3         | 0,0102  |
| 1422007_at   | aquaporin 3                                                                                                | Aqp3                | 2,3         | 0,0028  |
| 1456178_at   | BMP and activin membrane-bound inhibitor, pseudogene (Xenopus laevis Bambi-ps1)                            | Bambi-ps1           | 2,3         | 0,0039  |
| 1424295_at   | developmental pluripotency-associated 3                                                                    | Dppa3               | 2,3         | 0,0408  |
| 1418718_at   | chemokine (C-X-C motif) ligand 16                                                                          | Cxcl16              | 2,3         | 0,0024  |
| 1434130_at   | lipoma HMGIC fusion partner-like 2                                                                         | Lhfp12              | 2,3         | 0,0604  |
| 1418098_at   | adenylate cyclase 4                                                                                        | Adcy4               | 2,3         | 0,0045  |
| 1435323_a_at | membrane bound O-acyltransferase domain containing 1                                                       | Mboat1              | 2,3         | 0,0029  |

|              |                                                                               |                    |     |        |
|--------------|-------------------------------------------------------------------------------|--------------------|-----|--------|
| 1450355_a_at | capping protein (actin filament), gelsolin-like                               | Capg               | 2,2 | 0,0180 |
| 1427303_at   | ectonucleotide pyrophosphatase/phosphodiesterase 3                            | Enpp3              | 2,2 | 0,0215 |
| 1418580_at   | receptor transporter protein 4                                                | Rtp4               | 2,2 | 0,0025 |
| 1419576_at   | homeobox B13                                                                  | Hoxb13             | 2,2 | 0,0200 |
| 1424268_at   | spermine oxidase                                                              | Smox               | 2,2 | 0,0083 |
| 1451794_at   | transmembrane and coiled coil domains 3                                       | Tmcc3              | 2,2 | 0,0922 |
| 1456288_at   | schlafen 5                                                                    | Sln5               | 2,2 | 0,0254 |
| 1447861_x_at | Meis homeobox 2                                                               | Meis2              | 2,2 | 0,0809 |
| 1439114_at   | DEAD (Asp-Glu-Ala-Asp) box polypeptide 60                                     | Ddx60              | 2,2 | 0,0239 |
| 1451775_s_at | interleukin 13 receptor, alpha 1                                              | Il13ra1            | 2,2 | 0,0077 |
| 1431095_a_at | hect domain and RLD 5                                                         | Herc5              | 2,2 | 0,0348 |
| 1453939_x_at | predicted gene 9706                                                           | Gm9706             | 2,2 | 0,0506 |
| 1455423_at   | KH domain containing 1A                                                       | Khdc1a             | 2,2 | 0,0302 |
| 1446406_at   | ---                                                                           | ---                | 2,2 | 0,0364 |
| 1422757_at   | solute carrier family 5 (neutral amino acid transporters, system A), member 5 | Slc5a4b            | 2,1 | 0,0123 |
| 1427885_at   | polymerase (DNA-directed), delta 4                                            | Pold4              | 2,1 | 0,0278 |
| 1432260_at   | G protein-coupled receptor 39                                                 | Gpr39              | 2,1 | 0,0007 |
| 1423933_a_at | RIKEN cDNA 1600029D21 gene                                                    | 1600029D21Rik      | 2,1 | 0,0769 |
| 1456784_at   | predicted gene 14137                                                          | Gm14137            | 2,1 | 0,0196 |
| 1438856_x_at | serine (or cysteine) peptidase inhibitor, clade B, member 5                   | Serpinb5           | 2,1 | 0,0486 |
| 1449453_at   | bone marrow stromal cell antigen 1                                            | Bst1               | 2,1 | 0,0073 |
| 1460330_at   | annexin A3                                                                    | Anxa3              | 2,1 | 0,0086 |
| 1441941_x_at | serine (or cysteine) peptidase inhibitor, clade B, member 5                   | Serpinb5           | 2,1 | 0,0378 |
| 1451516_at   | Ras homolog enriched in brain like 1                                          | Rheb1              | 2,1 | 0,0363 |
| 1444270_at   | radial spoke head 4 homolog A (Chlamydomonas)                                 | Rsph4a             | 2,1 | 0,0015 |
| 1453757_at   | hect domain and RLD 5                                                         | Herc5              | 2,1 | 0,0093 |
| 1436417_at   | solute carrier family 19 (sodium/hydrogen exchanger), member 3                | Slc19a3            | 2,1 | 0,0231 |
| 1450430_at   | mannose receptor, C type 1                                                    | Mrc1               | 2,1 | 0,0051 |
| 1420931_at   | mitogen-activated protein kinase 8                                            | Mapk8              | 2,1 | 0,0180 |
| 1446509_at   | spermine oxidase                                                              | Smox               | 2,1 | 0,0125 |
| 1457632_s_at | Meis homeobox 2                                                               | Meis2              | 2,1 | 0,0889 |
| 1423017_a_at | interleukin 1 receptor antagonist                                             | Il1rn              | 2,1 | 0,0056 |
| 1430172_a_at | cytochrome P450, family 4, subfamily f, polypeptide 16 /// predicted gene     | Cyp4f16 /// Gm9705 | 2,1 | 0,0140 |
| 1424265_at   | N-acetylneuraminate pyruvate lyase                                            | Npl                | 2,1 | 0,0178 |
| 1421096_at   | transient receptor potential cation channel, subfamily C, member 1            | Trpc1              | 2,1 | 0,0510 |
| 1432374_a_at | ethanolaminephosphotransferase 1 (CDP-ethanolamine-specific)                  | Ept1               | 2,1 | 0,0216 |
| 1437161_x_at | RNA binding protein gene with multiple splicing                               | Rbpms              | 2,1 | 0,0691 |
| 1417837_at   | pleckstrin homology-like domain, family A, member 2                           | Phlda2             | 2,1 | 0,0065 |
| 1448813_at   | arylacetamide deacetylase (esterase)                                          | Aadac              | 2,1 | 0,0345 |
| 1418069_at   | apolipoprotein C-II                                                           | Apoc2              | 2,1 | 0,0041 |
| 1453590_at   | ADP-ribosylation factor-like 5B                                               | Arl5b              | 2,1 | 0,0861 |
| 1421011_at   | hydroxysteroid (17-beta) dehydrogenase 11                                     | Hsd17b11           | 2,1 | 0,0003 |
| 1450783_at   | interferon-induced protein with tetratricopeptide repeats 1                   | Ifit1              | 2,1 | 0,0329 |
| 1451755_a_at | apolipoprotein B mRNA editing enzyme, catalytic polypeptide 1                 | Apobec1            | 2,1 | 0,0192 |
| 1427302_at   | ectonucleotide pyrophosphatase/phosphodiesterase 3                            | Enpp3              | 2,1 | 0,0071 |
| 1432453_a_at | membrane-spanning 4-domains, subfamily A, member 10                           | Ms4a10             | 2,1 | 0,0188 |
| 1424592_a_at | deoxyribonuclease I                                                           | Dnase1             | 2,0 | 0,0066 |
| 1422846_at   | retinol binding protein 2, cellular                                           | Rbp2               | 2,0 | 0,0089 |
| 1421078_at   | transcription factor 23                                                       | Tcf23              | 2,0 | 0,0681 |
| 1416165_at   | RAB31, member RAS oncogene family                                             | Rab31              | 2,0 | 0,0018 |
| 1438606_a_at | chloride intracellular channel 4 (mitochondrial)                              | Clc4               | 2,0 | 0,0300 |
| 1456603_at   | family with sequence similarity 101, member B                                 | Fam101b            | 2,0 | 0,0002 |
| 1419395_at   | acyl-CoA thioesterase 12                                                      | Acot12             | 2,0 | 0,0270 |
| 1428271_at   | acyl-Coenzyme A binding domain containing 4                                   | Acbd4              | 2,0 | 0,0153 |

Suppl. Table 1: Differential gene expression in IEC from control and Casp8 $\Delta$ IEC mice. List of genes differentially expressed between IEC of control (n=3) and Casp8 $\Delta$ IEC (n=3) mice. Gene chip data was analyzed as described in methods. Only genes with a fold change in expression > 2.0 and a p-value of < 0.05 are shown.
